# Supplementary material for: Genome-wide analysis of proline-rich extension-like receptor protein kinase (PERK) in Brassica rapa and its association with the pollen development
Source: PubMed Central journal article supplement (PMC7296749; doi:10.1186/s12864-020-06802-9), 2020-06-15
Supplement: 12864_2020_6802_MOESM8_ESM.pdf [file 12864_2020_6802_MOESM8_ESM.pdf]

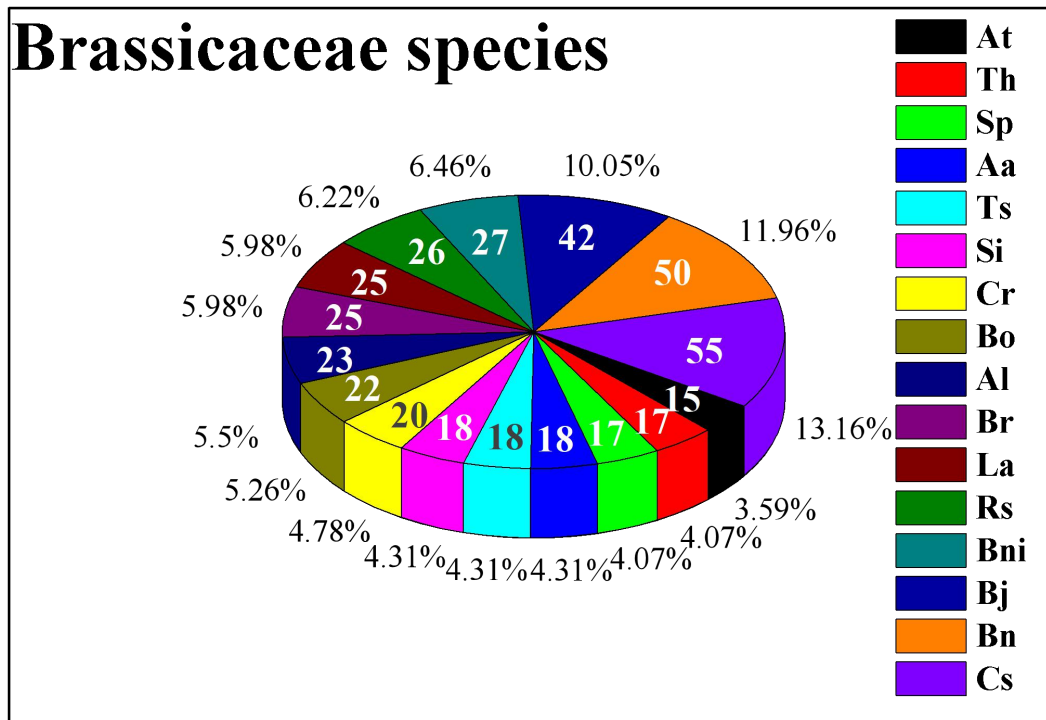

1

2 **Fig. S1.** Number and percentage of PERK proteins across the 16  
 3 Brassicaceae species. At, *Arabidopsis thaliana*; Aa, *Aethionema*  
 4 *arabicum*; Al, *Arabidopsis lyrata*; Br, *Brassica rapa*; Bni, *Brassica nigra*;  
 5 Bo, *Brassica oleracea*; Bn, *Brassica napus*; Bj, *Brassica juncea*; Cs,  
 6 *Camelina sativa*; Cr, *Capsella rubella*; La, *Leavenworthia alabamica*; Rs,  
 7 *Raphanus sativus*; Sp, *Schrenkiella parvula*; Si, *Sisymbrium irio*; Th,  
 8 *Thellungiella halophila*; Ts, *Thellungiella salsuginea*.
