# Supplementary material for: Genome-wide analysis of proline-rich extension-like receptor protein kinase (PERK) in Brassica rapa and its association with the pollen development
Source: PubMed Central journal article supplement (PMC7296749; doi:10.1186/s12864-020-06802-9), 2020-06-15
Supplement: 12864_2020_6802_MOESM9_ESM.pdf [file 12864_2020_6802_MOESM9_ESM.pdf]

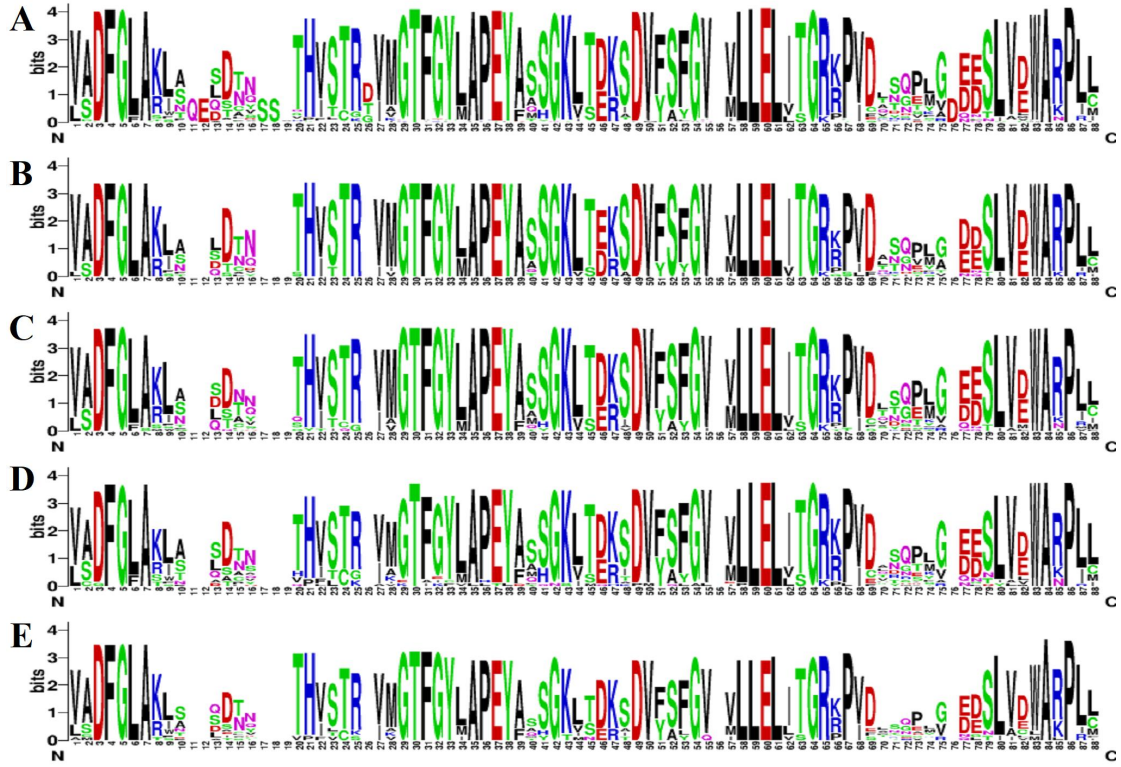

1

2 **Fig. S2.** Sequence logos of conserved amino acid residues in *Arabidopsis*  
 3 *thaliana* and three *Brassica* species (*B. rapa*, *B. nigra* and *B. oleracea*). A,  
 4 four species of *A. thaliana*, *B. rapa*, *B. nigra* and *B. oleracea*. B, *A.*  
 5 *thaliana*. C, *B. rapa*. D, *B. nigra*. E, *B. oleracea*.
