# Supplementary material for: Genome-wide analysis of proline-rich extension-like receptor protein kinase (PERK) in Brassica rapa and its association with the pollen development
Source: PubMed Central journal article supplement (PMC7296749; doi:10.1186/s12864-020-06802-9), 2020-06-15
Supplement: 12864_2020_6802_MOESM11_ESM.pdf [file 12864_2020_6802_MOESM11_ESM.pdf]

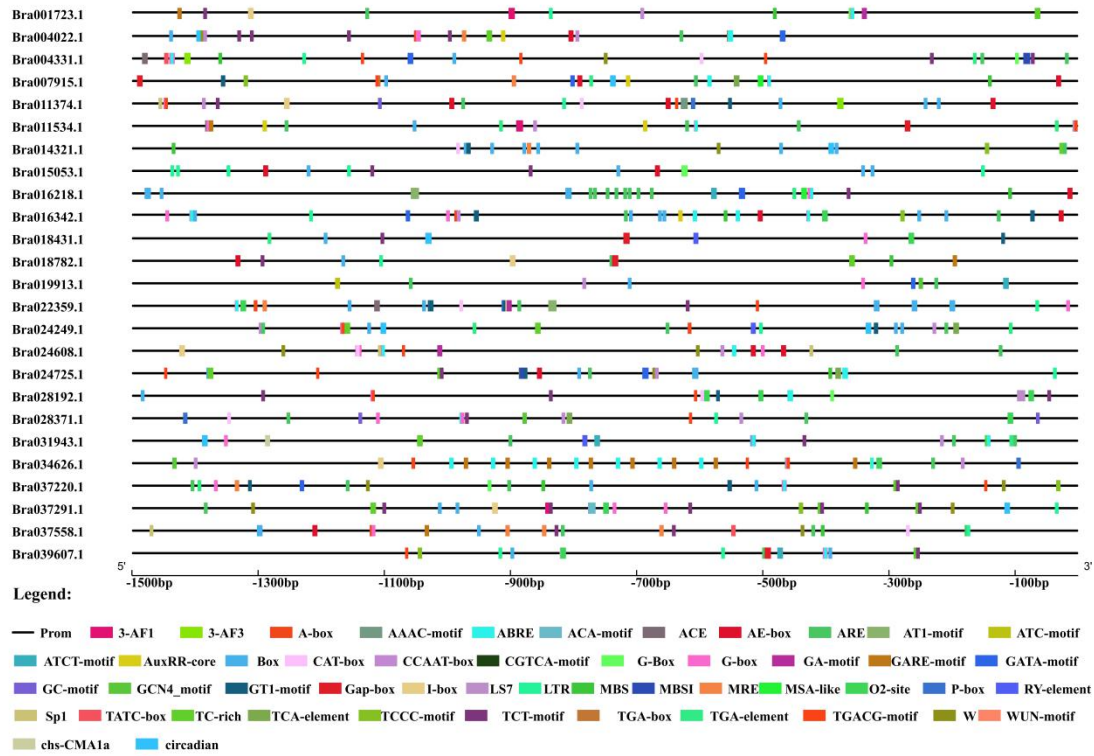

1

2 **Fig. S4.** *cis*-acting regulatory element analysis of *BrPERKs* promoters by  
 3 PlantCARE. Different *cis*-acting regulatory elements are indicated by  
 4 different coloured boxes. All the *cis*-acting regulatory elements were  
 5 calculated and their function were annotated in Table S4.

6
