# Supplementary material for: Genome-wide analysis of proline-rich extension-like receptor protein kinase (PERK) in Brassica rapa and its association with the pollen development
Source: PubMed Central journal article supplement (PMC7296749; doi:10.1186/s12864-020-06802-9), 2020-06-15
Supplement: 12864_2020_6802_MOESM13_ESM.pdf [file 12864_2020_6802_MOESM13_ESM.pdf]

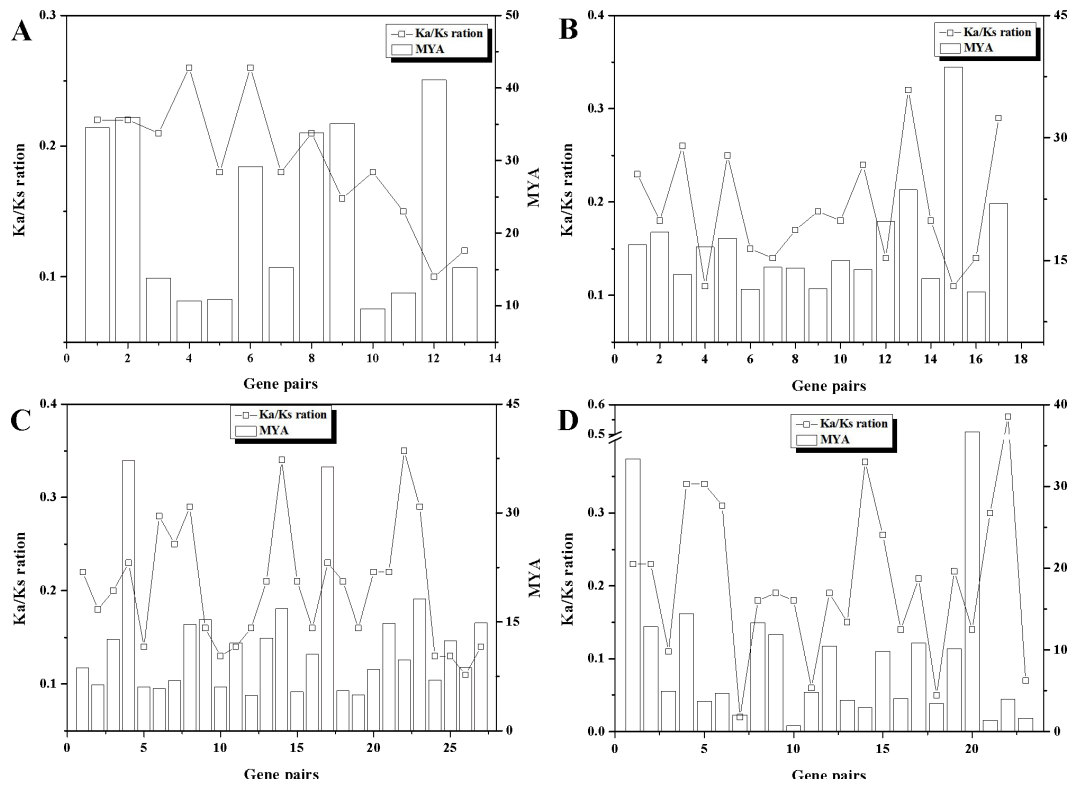

1

2 **Fig. S6.**  $Ka/Ks$  values and divergence times of orthologous / paralogous

3 gene pairs. A, Br-Br; B, Br-At; C, Br-Bni; D, Br-Bo.
