# Supplementary material for: Genome-wide analysis of proline-rich extension-like receptor protein kinase (PERK) in Brassica rapa and its association with the pollen development
Source: PubMed Central journal article supplement (PMC7296749; doi:10.1186/s12864-020-06802-9), 2020-06-15
Supplement: 12864_2020_6802_MOESM14_ESM.pdf [file 12864_2020_6802_MOESM14_ESM.pdf]

1

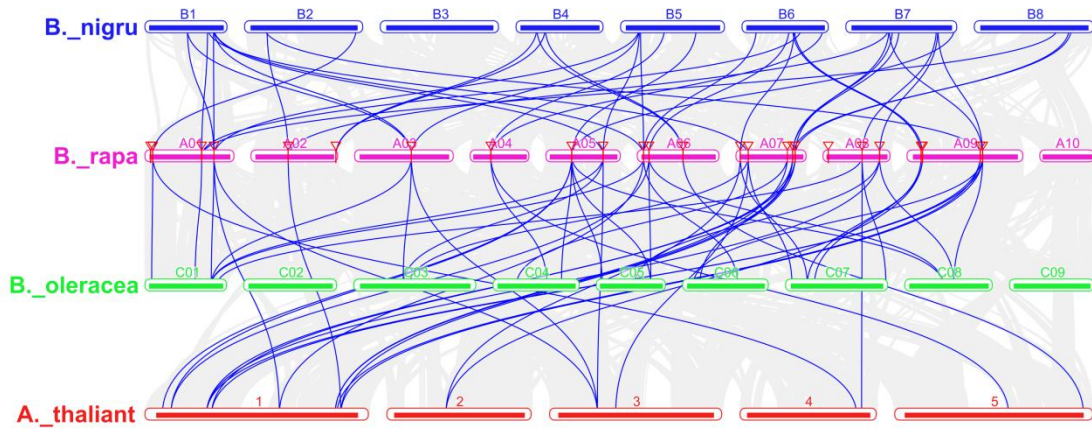

2

3 **Fig. S7.** *BrPERK* gene duplication analysis between *B. rapa* (AA) and *A.*  
4 *thaliana*, *B. nigro* (BB) and *B. oleracea* (CC).
