# Supplementary material for: Genome-wide analysis of proline-rich extension-like receptor protein kinase (PERK) in Brassica rapa and its association with the pollen development
Source: PubMed Central journal article supplement (PMC7296749; doi:10.1186/s12864-020-06802-9), 2020-06-15
Supplement: 12864_2020_6802_MOESM16_ESM.pdf [file 12864_2020_6802_MOESM16_ESM.pdf]

1

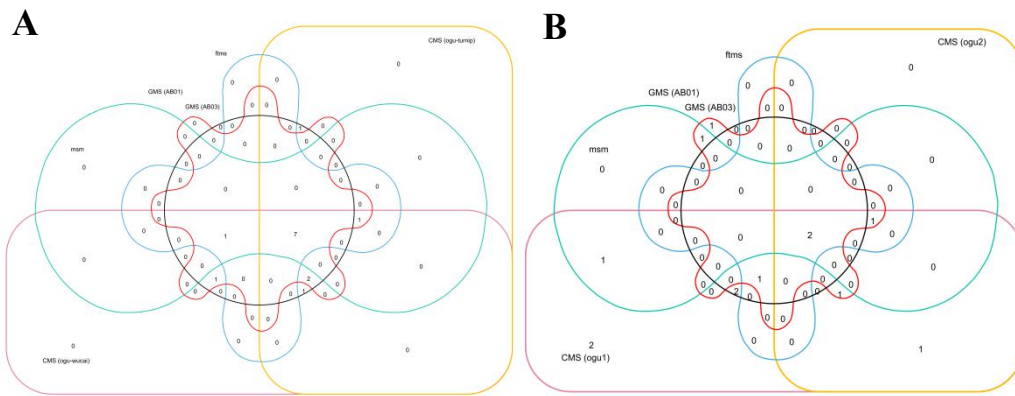

2

3 **Fig. S9.** Venn plots of *BrPERK* DEGs (A) and *BrPERK* co-expression  
4 genes (B) in six *B. rapa* male sterile lines.
